# Supplementary material
Source: PubMed Central journal article supplement (PMC5913835)
Supplement: IAI.00042-18_zii999092401s1.pdf [file IAI.00042-18_zii999092401s1.pdf]

**TABLE S1** Bioinformatics analysis in figures.

| <b>Parameter</b>                                                                                           | <b>Number</b> |
|------------------------------------------------------------------------------------------------------------|---------------|
| Contigs <i>de novo</i> assembled by Trinity and clustered by CD-Hit ( $\geq 98\%$ identity)                | 134911        |
| ORFs predicted by TransDecoder (cutoff: protein length $\geq 100$ aa)                                      | 66919         |
| ORFs with Pfam annotation                                                                                  | 31535         |
| Single 'best' ORF per transcript according to pfam results and sequence length, with longer ORFs preferred | 36951         |
| with orthologous group (according to eggNOG)                                                               | 28305         |
| Proteins with at least one blastp hit (cutoff: E-value $\leq 10^{-4}$ )                                    | 39179         |
| Proteins with an arthropod sequence as first blastp hit                                                    | 17916         |
| with GO Annotation (according to blast2GO)                                                                 | 10871         |
| with predicted signal peptide and without transmembrane domains (according to InterPRO)                    | 1362          |

**TABLE S2** Blastp 5 top-hit species distribution.

| <b>Species</b>                 | <b>Number of blast top-hits</b> |
|--------------------------------|---------------------------------|
| <i>Zootermopsis nevadensis</i> | 3368                            |
| <i>Cimex lectularius</i>       | 2336                            |
| <i>Halyomorpha halys</i>       | 2156                            |
| <i>Tribolium castaneum</i>     | 903                             |
| <i>Acyrtosiphon pisum</i>      | 824                             |

**TABLE S3** Overview of *Euscelidius variegatus* transcripts up-regulated during chrysanthemum yellows (CYp) infection, compared with insects infected by Flavescence dorée (FDp) phytoplasmas. Transcripts were classified into functional categories according to the putative identification assigned by a blastx search.

| Contig accession*                     | Eva transcript ID | Sequence description                                                                                                             | Hit Accession  | Organism                          | E-Value |
|---------------------------------------|-------------------|----------------------------------------------------------------------------------------------------------------------------------|----------------|-----------------------------------|---------|
| <b>Immune response</b>                |                   |                                                                                                                                  |                |                                   |         |
| GFTU01010641.1                        | TR70079_c0_g2_i1  | PREDICTED: serpin B3-like                                                                                                        | XP_014246505.1 | <i>Cimex lectularius</i>          | 3E-45   |
| GFTU01009442.1                        | TR59420_c0_g3_i1  | hypothetical protein g.45731 (Protein Disulfide Isomerase (PDIa) family, redox active TRX domains)                               | JAT21035.1     | <i>Graphocephala atropunctata</i> | 0       |
| GFTU01009443.1                        | TR59420_c0_g3_i5  | PREDICTED: uncharacterized protein LOC109042410 isoform X4 (Protein Disulfide Isomerase (PDIa) family, redox active TRX domains) | XP_018914663.1 | <i>Bemisia tabaci</i>             | 0       |
| GFTU01009445.1                        | TR59420_c0_g3_i8  | PREDICTED: uncharacterized protein LOC106678838 isoform X8 (Protein Disulfide Isomerase (PDIa) family, redox active TRX domains) | XP_014273104.1 | <i>Halyomorpha halys</i>          | 0       |
| GFTU01009444.1                        | TR59420_c0_g3_i7  | hypothetical protein g.45731 (Protein Disulfide Isomerase (PDIa) family, redox active TRX domains)                               | JAT21035.1     | <i>Graphocephala atropunctata</i> | 0       |
| GFTU01012880.1                        | TR94789_c0_g1_i1  | PREDICTED: protein disulfide-isomerase A6                                                                                        | XP_011301143.1 | <i>Fopius arisanus</i>            | 1E-15   |
| GFTU01010415.1                        | TR68562_c5_g1_i1  | PREDICTED: gamma-interferon-inducible lysosomal thiol reductase-like                                                             | XP_008190385.1 | <i>Tribolium castaneum</i>        | 2E-13   |
| GFTU01003389.1                        | TR10030_c0_g1_i1  | hypothetical protein g.13589 (Single domain von Willebrand factor type C)                                                        | JAS60102.1     | <i>Cuerna arida</i>               | 2E-12   |
| GFTU01000362.1                        | TR17520_c1_g1_i2  | PREDICTED: hexamerin 4 isoform X1                                                                                                | XP_008197349.1 | <i>Tribolium castaneum</i>        | 9E-25   |
| GFTU01005409.1                        | TR25619_c0_g1_i1  | chitinase                                                                                                                        | AJO25038.1     | <i>Nilaparvata lugens</i>         | 0       |
| GFTU01006368.1                        | TR33965_c0_g1_i1  | PREDICTED: E3 ubiquitin-protein ligase HUWE1 isoform X5                                                                          | XP_005162339.1 | <i>Danio rerio</i>                | 0       |
| <b>Movement and energy metabolism</b> |                   |                                                                                                                                  |                |                                   |         |
| GFTU01004258.1                        | TR16310_c0_g1_i4  | PREDICTED: troponin I-like isoform X2                                                                                            | XP_015117836.1 | <i>Diachasma alloenum</i>         | 3E-50   |
| GFTU01000669.1                        | TR32741_c1_g2_i1  | PREDICTED: maltase A1-like                                                                                                       | XP_003703631.1 | <i>Megachile rotundata</i>        | 1E-42   |
| GFTU01001629.1                        | TR82415_c2_g3_i8  | PREDICTED: twitchin isoform X25                                                                                                  | XP_015599633.1 | <i>Cephus cinctus</i>             | 0       |
| GFTU01012455.1                        | TR82415_c2_g3_i13 | PREDICTED: twitchin isoform X19                                                                                                  | XP_015599627.1 | <i>Cephus cinctus</i>             | 0       |
| GFTU01012453.1                        | TR82415_c2_g3_i1  | PREDICTED: twitchin isoform X23                                                                                                  | XP_015599631.1 | <i>Cephus cinctus</i>             | 0       |
| GFTU01001631.1                        | TR82415_c2_g3_i21 | PREDICTED: twitchin isoform X1                                                                                                   | XP_012289119.1 | <i>Orussus abietinus</i>          | 0       |
| GFTU01001630.1                        | TR82415_c2_g3_i20 | PREDICTED: twitchin isoform X1                                                                                                   | XP_012289119.1 | <i>Orussus abietinus</i>          | 0       |
| GFTU01001638.1                        | TR82415_c2_g3_i40 | PREDICTED: twitchin isoform X1                                                                                                   | XP_012289119.1 | <i>Orussus abietinus</i>          | 0       |
| GFTU01001632.1                        | TR82415_c2_g3_i24 | PREDICTED: twitchin isoform X1                                                                                                   | XP_012289119.1 | <i>Orussus abietinus</i>          | 0       |
| GFTU01001635.1                        | TR82415_c2_g3_i31 | PREDICTED: twitchin isoform X1                                                                                                   | XP_012289119.1 | <i>Orussus abietinus</i>          | 0       |
| GFTU01001634.1                        | TR82415_c2_g3_i30 | PREDICTED: twitchin isoform X23                                                                                                  | XP_015599631.1 | <i>Cephus cinctus</i>             | 0       |
| GFTU01001636.1                        | TR82415_c2_g3_i37 | PREDICTED: twitchin isoform X25                                                                                                  | XP_015599633.1 | <i>Cephus cinctus</i>             | 0       |
| GFTU01001637.1                        | TR82415_c2_g3_i39 | PREDICTED: twitchin isoform X25                                                                                                  | XP_015599633.1 | <i>Cephus cinctus</i>             | 0       |
| GFTU01001633.1                        | TR82415_c2_g3_i27 | PREDICTED: twitchin isoform X24                                                                                                  | XP_015599632.1 | <i>Cephus cinctus</i>             | 0       |
| GFTU01012458.1                        | TR82415_c2_g3_i38 | PREDICTED: twitchin isoform X16                                                                                                  | XP_014256281.1 | <i>Cimex lectularius</i>          | 0       |
| GFTU01012456.1                        | TR82415_c2_g3_i28 | PREDICTED: twitchin isoform X13                                                                                                  | XP_018903677.1 | <i>Bemisia tabaci</i>             | 0       |
| GFTU01001910.1                        | TR201186_c0_g1_i1 | PREDICTED: arginine kinase                                                                                                       | XP_014239180.1 | <i>Cimex lectularius</i>          | 0       |
| GFTU01009195.1                        | TR57237_c0_g1_i1  | PREDICTED: myosin light chain alkali                                                                                             | XP_014291721.1 | <i>Halyomorpha halys</i>          | 6E-48   |
| GFTU01001677.1                        | TR83034_c0_g1_i1  | PREDICTED: myosin heavy chain, muscle isoform X30                                                                                | XP_016656804.1 | <i>Acyrtosiphon pisum</i>         | 0       |
| GFTU01002981.1                        | TR6028_c0_g1_i11  | PREDICTED: PDZ and LIM domain protein 3 isoform X3                                                                               | XP_014283142.1 | <i>Halyomorpha halys</i>          | 6E-102  |
| GFTU01000140.1                        | TR6028_c0_g1_i10  | PREDICTED: PDZ and LIM domain protein 3 isoform X4                                                                               | XP_014283149.1 | <i>Halyomorpha halys</i>          | 9E-89   |
| GFTU01012488.1                        | TR82451_c1_g1_i1  | PREDICTED: sarcalumenin isoform X2                                                                                               | XP_014255390.1 | <i>Cimex lectularius</i>          | 0       |
| GFTU01006510.1                        | TR34691_c1_g3_i2  | actin muscle                                                                                                                     | XP_002426688.1 | <i>Acyrtosiphon pisum</i>         | 0       |
| GFTU01009078.1                        | TR56715_c0_g1_i1  | PREDICTED: muscle M-line assembly protein unc-89 isoform X1                                                                      | XP_018906227.1 | <i>Bemisia tabaci</i>             | 0       |
| GFTU01012457.1                        | TR82415_c2_g3_i29 | PREDICTED: muscle M-line assembly protein unc-89-like                                                                            | XP_014256262.1 | <i>Cimex lectularius</i>          | 0       |

|                      |                   |                                                                                                   |                |                                   |        |
|----------------------|-------------------|---------------------------------------------------------------------------------------------------|----------------|-----------------------------------|--------|
| GFTU01012454.1       | TR82415_c2_g3_i11 | PREDICTED: muscle M-line assembly protein unc-89-like                                             | XP_014256262.1 | <i>Cimex lectularius</i>          | 0      |
| GFTU01001628.1       | TR82415_c2_g3_i7  | PREDICTED: muscle M-line assembly protein unc-89-like                                             | XP_014256262.1 | <i>Cimex lectularius</i>          | 0      |
| GFTU01007383.1       | TR44181_c1_g1_i1  | PREDICTED: titin isoform X2                                                                       | XP_014261219.1 | <i>Cimex lectularius</i>          | 0      |
| GFTU01010045.1       | TR65388_c0_g1_i1  | PREDICTED: titin-like, partial                                                                    | XP_015517479.1 | <i>Neodiprion lecontei</i>        | 0      |
| GFTU01008365.1       | TR51524_c0_g1_i5  | PREDICTED: ryanodine receptor                                                                     | XP_014270803.1 | <i>Halyomorpha halys</i>          | 0      |
| GFTU01008363.1       | TR51524_c0_g1_i1  | PREDICTED: ryanodine receptor                                                                     | XP_014270803.1 | <i>Halyomorpha halys</i>          | 0      |
| GFTU01002369.1       | TR1465_c0_g1_i1   | D-beta-hydroxybutyrate dehydrogenase, putative                                                    | XP_002430627.1 | <i>Pediculus humanus corporis</i> | 3E-155 |
| GFTU01014213.1       | TR172637_c0_g1_i1 | PREDICTED: calcium-transporting ATPase sarcoplasmic/endoplasmic reticulum type isoform X3 (SERCA) | XP_014240091.1 | <i>Cimex lectularius</i>          | 0      |
| GFTU01010911.1       | TR71289_c0_g1_i1  | PREDICTED: dynein beta chain, ciliary-like                                                        | XP_014246445.1 | <i>Cimex lectularius</i>          | 0      |
| Proteases            |                   |                                                                                                   |                |                                   |        |
| GFTU01004471.1       | TR18473_c0_g1_i1  | PREDICTED: cathepsin L1                                                                           | XP_015592402.1 | <i>Cephus cinctus</i>             | 2E-55  |
| GFTU01003425.1       | TR10248_c0_g2_i1  | hypothetical protein g.35645 (Peptidase M1 Aminopeptidase N)                                      | JAS50411.1     | <i>Cuerna arida</i>               | 2E-148 |
| GFTU01001733.1       | TR147669_c0_g1_i1 | hypothetical protein g.22606 (Peptidase M1 Aminopeptidase N family)                               | JAS92288.1     | <i>Homalodisca liturata</i>       | 0.0    |
| GFTU01012473.1       | TR82434_c0_g6_i2  | PREDICTED: prostatic acid phosphatase-like                                                        | XP_014279962.1 | <i>Halyomorpha halys</i>          | 2E-101 |
| GFTU01013458.1       | TR135531_c0_g1_i1 | hypothetical protein g.31954 (Chitin-binding domain type 2, Peptidase M1 Aminopeptidase N family) | JAT07207.1     | <i>Homalodisca liturata</i>       | 5E-51  |
| GFTU01002473.1       | TR2416_c0_g1_i1   | PREDICTED: neprilysin isoform X1 (membrane metallo-endopeptidase)                                 | XP_015600086.1 | <i>Cephus cinctus</i>             | 0      |
| GFTU01016619.1       | TR222575_c0_g1_i1 | PREDICTED: leucyl-cystinyl aminopeptidase-like                                                    | XP_014296891.1 | <i>Microplitis demolitor</i>      | 1E-31  |
| GFTU01003281.1       | TR9182_c0_g1_i2   | PREDICTED: membrane metallo-endopeptidase-like 1 isoform X3                                       | XP_012244761.1 | <i>Bombus impatiens</i>           | 1E-170 |
| GFTU01012719.1       | TR83509_c2_g2_i1  | hypothetical protein g.32075 (invasion associated secreted endopeptidase; Provisional)            | JAT00648.1     | <i>Homalodisca liturata</i>       | 0      |
| Extracellular matrix |                   |                                                                                                   |                |                                   |        |
| GFTU01000571.1       | TR27727_c2_g1_i1  | PREDICTED: neurogenic locus notch homolog protein 3-like, partial                                 | XP_015378277.1 | <i>Diuraphis noxia</i>            | 0      |
| GFTU01005879.1       | TR28949_c0_g1_i1  | PREDICTED: neurogenic locus notch homolog protein 1                                               | XP_001944803.2 | <i>Acyrtosiphon pisum</i>         | 2E-175 |
| GFTU01007832.1       | TR47223_c0_g1_i4  | PREDICTED: membrane-associated guanylate kinase, WW and PDZ domain-containing protein 3-like      | XP_015370062.1 | <i>Diuraphis noxia</i>            | 1E-32  |
| GFTU01007834.1       | TR47223_c0_g1_i6  | PREDICTED: membrane-associated guanylate kinase, WW and PDZ domain-containing protein 3-like      | XP_015370062.1 | <i>Diuraphis noxia</i>            | 1E-32  |
| GFTU01007833.1       | TR47223_c0_g1_i5  | PREDICTED: membrane-associated guanylate kinase, WW and PDZ domain-containing protein 3-like      | XP_015370062.1 | <i>Diuraphis noxia</i>            | 1E-32  |
| GFTU01007831.1       | TR47223_c0_g1_i3  | PREDICTED: membrane-associated guanylate kinase, WW and PDZ domain-containing protein 3-like      | XP_015370062.1 | <i>Diuraphis noxia</i>            | 1E-32  |
| GFTU01011451.1       | TR76061_c1_g1_i13 | hypothetical protein g.48125 (Calcium-binding EGF-like domain)                                    | JAT25493.1     | <i>Graphocephala atropunctata</i> | 0      |
| GFTU01001449.1       | TR76061_c1_g1_i15 | PREDICTED: uncharacterized protein LOC658528 (Calcium-binding EGF-like domain)                    | XP_015839066.1 | <i>Tribolium castaneum</i>        | 0      |
| GFTU01001450.1       | TR76061_c1_g1_i25 | PREDICTED: uncharacterized protein LOC106669909 (Calcium-binding EGF-like domain)                 | XP_014255247.1 | <i>Cimex lectularius</i>          | 0      |
| GFTU01001448.1       | TR76061_c1_g1_i3  | PREDICTED: uncharacterized protein LOC658528 (Calcium-binding EGF-like domain)                    | XP_015839066.1 | <i>Tribolium castaneum</i>        | 0      |
| GFTU01011448.1       | TR76061_c1_g1_i4  | PREDICTED: uncharacterized protein LOC106669909 (Calcium-binding EGF-like domain)                 | XP_014255247.1 | <i>Cimex lectularius</i>          | 0      |
| GFTU01009271.1       | TR58448_c2_g2_i8  | PREDICTED: basement membrane-specific heparan sulfate proteoglycan core protein isoform X19       | XP_011265246.1 | <i>Camponotus floridanus</i>      | 0      |
| GFTU01009275.1       | TR58448_c2_g2_i17 | PREDICTED: basement membrane-specific heparan sulfate proteoglycan core protein isoform X7        | XP_011864488.1 | <i>Vollenhovia emeryi</i>         | 0      |
| GFTU01001084.1       | TR58448_c2_g2_i10 | PREDICTED: basement membrane-specific heparan sulfate proteoglycan core protein isoform X8        | XP_016918284.1 | <i>Apis cerana</i>                | 0      |
| GFTU01009272.1       | TR58448_c2_g2_i9  | PREDICTED: basement membrane-specific heparan sulfate proteoglycan core protein isoform X6        | XP_014478061.1 | <i>Dinoponera quadriceps</i>      | 0      |

|                      |                   |                                                                                             |                |                                   |        |
|----------------------|-------------------|---------------------------------------------------------------------------------------------|----------------|-----------------------------------|--------|
| GFTU01009276.1       | TR58448_c2_g2_i18 | PREDICTED: basement membrane-specific heparan sulfate proteoglycan core protein isoform X13 | XP_011864494.1 | <i>Vollenhovia emeryi</i>         | 0      |
| GFTU01009270.1       | TR58448_c2_g2_i7  | PREDICTED: basement membrane-specific heparan sulfate proteoglycan core protein isoform X21 | XP_015835390.1 | <i>Tribolium castaneum</i>        | 0      |
| GFTU01009274.1       | TR58448_c2_g2_i14 | PREDICTED: basement membrane-specific heparan sulfate proteoglycan core protein isoform X15 | XP_011864496.1 | <i>Vollenhovia emeryi</i>         | 0      |
| GFTU01009267.1       | TR58448_c2_g2_i2  | PREDICTED: basement membrane-specific heparan sulfate proteoglycan core protein             | XP_011054372.1 | <i>Acromyrmex echinator</i>       | 0      |
| GFTU01003839.1       | TR13893_c7_g1_i1  | PREDICTED: protein mesh isoform X2                                                          | XP_015366076.1 | <i>Diuraphis noxia</i>            | 0      |
| Nucleic acid binding |                   |                                                                                             |                |                                   |        |
| GFTU01010183.1       | TR67138_c1_g2_i1  | PREDICTED: piggyBac transposable element-derived protein 4-like                             | XP_014676879.1 | <i>Priapulus caudatus</i>         | 1E-59  |
| GFTU01001044.1       | TR56227_c8_g1_i4  | PREDICTED: RNA-directed DNA polymerase from mobile element jockey-like                      | XP_015438077.1 | <i>Dufourea novaeangliae</i>      | 0      |
| GFTU01010403.1       | TR68543_c0_g1_i1  | PREDICTED: retrovirus-related Pol polyprotein from transposon 17.6                          | XP_015840034.1 | <i>Tribolium castaneum</i>        | 6E-173 |
| GFTU01004281.1       | TR16696_c1_g2_i2  | PREDICTED: uncharacterized protein K02A2.6-like (2 integrases)                              | XP_014262899.1 | <i>Maylandia zebra</i>            | 0      |
| GFTU01004309.1       | TR16773_c1_g1_i2  | Hypothetical protein g.15643 (integrase)                                                    | JAT29099.1     | <i>Graphocephala atropunctata</i> | 4E-112 |
| GFTU01007993.1       | TR48210_c0_g1_i1  | PREDICTED: nuclear factor interleukin-3-regulated protein                                   | XP_014273353.1 | <i>Halyomorpha halys</i>          | 1E-126 |
| Detoxification       |                   |                                                                                             |                |                                   |        |
| GFTU01009741.1       | TR61468_c0_g1_i1  | PREDICTED: venom carboxylesterase-6                                                         | XP_012275036.1 | <i>Orussus abietinus</i>          | 2E-170 |
| GFTU01002688.1       | TR3320_c0_g1_i1   | PREDICTED: cytochrome P450 4C1-like                                                         | XP_008482780.1 | <i>Diaphorina citri</i>           | 0      |
| GFTU01002689.1       | TR3320_c0_g1_i2   | PREDICTED: cytochrome P450 4C1-like                                                         | XP_008482780.1 | <i>Diaphorina citri</i>           | 4E-162 |
| GFTU01000057.1       | TR2236_c0_g2_i1   | PREDICTED: gamma-aminobutyric acid receptor subunit alpha-6-like                            | XP_014254948.1 | <i>Cimex lectularius</i>          | 3E-48  |

\* Contig Accessions correspond to BioProject PRJNA393620.

**TABLE S4** Overview of *Euscelidius variegatus* transcripts down-regulated during chrysanthemum yellows (CYp) infection, compared with insects infected by Flavescence dorée (FDp) phytoplasmas. Transcripts were classified into functional categories according to the putative identification assigned by a blastx search.

| Contig accession*              | Eva transcript ID | Sequence description                                                                         | Hit Accession  | Organisms                         | E-Value  |
|--------------------------------|-------------------|----------------------------------------------------------------------------------------------|----------------|-----------------------------------|----------|
| Immune response                |                   |                                                                                              |                |                                   |          |
| GFTU01001177.1                 | TR64039_c0_g1_i3  | PREDICTED: mitogen-activated protein kinase kinase kinase 12 isoform X2                      | XP_012256857.1 | <i>Athalia rosae</i>              | 0        |
| GFTU01016523.1                 | TR220860_c1_g1_i1 | PREDICTED: serine protease snake-like isoform X2                                             | XP_014259171.1 | <i>Cimex lectularius</i>          | 2E-99    |
| GFTU01005213.1                 | TR23882_c3_g1_i1  | hypothetical protein g.9121 (Kazal-type 1 serine protease inhibitor-like protein type gamma) | JAT33323.1     | <i>Graphocephala atropunctata</i> | 3E-37    |
| GFTU01006779.1                 | TR39162_c0_g1_i1  | hypothetical protein g.7830 (Kazal-type 1 serine protease inhibitor-like protein type gamma) | JAS84502.1     | <i>Homalodisca liturata</i>       | 9E-24    |
| GFTU01007903.1                 | TR47813_c0_g1_i1  | PREDICTED: protein farnesyltransferase/geranylgeranyltransferase type-1 subunit alpha        | XP_015511043.1 | <i>Neodiprion lecontei</i>        | 1E-119   |
| GFTU01003663.1                 | TR12299_c0_g1_i3  | PREDICTED: Kruppel-like factor 10                                                            | XP_008469759.1 | <i>Diaphorina citri</i>           | 8E-72    |
| GFTU01003662.1                 | TR12299_c0_g1_i1  | PREDICTED: Kruppel-like factor 10                                                            | XP_008469759.1 | <i>Diaphorina citri</i>           | 8E-71    |
| GFTU01005275.1                 | TR25275_c0_g1_i1  | PREDICTED: circadian clock-controlled protein-like                                           | XP_014245484.1 | <i>Cimex lectularius</i>          | 6E-92    |
| GFTU01002709.1                 | TR3427_c0_g2_i1   | PREDICTED: heat shock protein 68-like                                                        | XP_013201116.1 | <i>Amyelois transitella</i>       | 0        |
| GFTU01007012.1                 | TR40569_c0_g1_i1  | PREDICTED: pancreatic triacylglycerol lipase-like                                            | XP_014247562.1 | <i>Cimex lectularius</i>          | 3E-60    |
| Movement and energy metabolism |                   |                                                                                              |                |                                   |          |
| GFTU01009515.1                 | TR59721_c0_g2_i6  | dihydropyridine-sensitive l-type calcium channel (DHPR)                                      | XP_014253595.1 | <i>Cimex lectularius</i>          | 1.20E-06 |
| Proteases                      |                   |                                                                                              |                |                                   |          |
| GFTU01013038.1                 | TR105022_c0_g1_i1 | PREDICTED: cathepsin D-like                                                                  | XP_014270708.1 | <i>Halyomorpha halys</i>          | 9E-29    |

| Detoxification |                |                                         |                |                            |        |
|----------------|----------------|-----------------------------------------|----------------|----------------------------|--------|
| GFTU01002121.1 | TR236 c1 g2 i1 | PREDICTED: probable cytochrome P4506a14 | XP_008192267.1 | <i>Tribolium castaneum</i> | 1E-147 |

\* Contig Accessions correspond to BioProject PRJNA393620.

**TABLE S5** qPCR Validation. Mean normalized relative quantities  $\pm$  standard error of each gene in the category healthy (H), infected by chrysanthemum yellows (CYp) or by Flavescence dorée (FDp) phytoplasmas. Within the same category (H, CY, FD), asterisks indicate significant differences between female and male of each category. Within the same gender, different letters indicate significant differences among the categories (capitalized for females and small for males). Whenever no sex-related differences were recorded within the same category, female and male data were pooled.

| Mechanism                      | Gene             | Female                                 |                                        |                                        | Male                                     |                                        |                                         |
|--------------------------------|------------------|----------------------------------------|----------------------------------------|----------------------------------------|------------------------------------------|----------------------------------------|-----------------------------------------|
|                                |                  | H                                      | CY                                     | FD                                     | H                                        | CY                                     | FD                                      |
| Immune response                | phenoloxidase    | 1.41 <sup>A</sup> $\pm$ 0.35<br>(N=7)  | 1.42 <sup>A</sup> $\pm$ 0.21<br>(N=7)  | 2.02 <sup>A</sup> $\pm$ 0.83<br>(N=7)  | 1.22 <sup>a</sup> $\pm$ 0.23<br>(N=6)    | 1.44 <sup>a</sup> $\pm$ 0.35<br>(N=6)  | 1.25 <sup>a</sup> $\pm$ 0.15<br>(N=7)   |
|                                | sex pooled       | 1.32 <sup>a</sup> $\pm$ 0.21 (N=13)    |                                        | 1.43 <sup>a</sup> $\pm$ 0.19 (N=13)    |                                          | 1.64 <sup>a</sup> $\pm$ 0.42 (N=14)    |                                         |
|                                | Kazal type 1     | 0.91 <sup>A*</sup> $\pm$ 0.17<br>(N=7) | 0.79 <sup>A*</sup> $\pm$ 0.13<br>(N=7) | 0.73 <sup>A</sup> $\pm$ 0.13<br>(N=7)  | 0.47 <sup>ab*</sup> $\pm$ 0.05<br>(N=6)  | 0.41 <sup>a*</sup> $\pm$ 0.08<br>(N=7) | 0.71 <sup>b</sup> $\pm$ 0.09<br>(N=7)   |
| Movement and energy metabolism | myosin           | 0.42 <sup>A*</sup> $\pm$ 0.11<br>(N=7) | 0.40 <sup>A*</sup> $\pm$ 0.03<br>(N=7) | 0.32 <sup>A*</sup> $\pm$ 0.01<br>(N=7) | 0.97 <sup>*</sup> $\pm$ 0.20<br>(N=6)    | 1.22 <sup>*</sup> $\pm$ 0.131<br>(N=7) | 0.89 <sup>a*</sup> $\pm$ 0.11<br>(N=7)  |
|                                | tropomyosin      | 1.09 <sup>A</sup> $\pm$ 0.28<br>(N=7)  | 1.67 <sup>A*</sup> $\pm$ 0.19<br>(N=7) | 1.31 <sup>A*</sup> $\pm$ 0.21<br>(N=7) | 1.98 <sup>a</sup> $\pm$ 0.56<br>(N=6)    | 6.00 <sup>b*</sup> $\pm$ 1.01<br>(N=7) | 2.48 <sup>ab*</sup> $\pm$ 0.41<br>(N=7) |
|                                | arginine kinase  | 0.72 <sup>AB</sup> $\pm$ 0.11<br>(N=7) | 0.96 <sup>A*</sup> $\pm$ 0.06<br>(N=7) | 0.64 <sup>B*</sup> $\pm$ 0.06<br>(N=7) | 1.59 <sup>a</sup> $\pm$ 0.38<br>(N=6)    | 3.59 <sup>b*</sup> $\pm$ 0.32<br>(N=7) | 1.51 <sup>a*</sup> $\pm$ 0.13<br>(N=7)  |
|                                | maltase          | 0.39 <sup>A*</sup> $\pm$ 0.07<br>(N=7) | 0.68 <sup>A*</sup> $\pm$ 0.21<br>(N=7) | 1.26 <sup>A*</sup> $\pm$ 0.36<br>(N=7) | 2.85 <sup>*</sup> $\pm$ 0.85<br>(N=6)    | 5.72 <sup>*</sup> $\pm$ 1.55<br>(N=7)  | 3.48 <sup>a*</sup> $\pm$ 0.71<br>(N=7)  |
| Proteases                      | cathepsin L_92i3 | 0.67 <sup>AB</sup> $\pm$ 0.07<br>(N=7) | 0.97 <sup>A</sup> $\pm$ 0.08<br>(N=7)  | 0.56 <sup>B*</sup> $\pm$ 0.08<br>(N=7) | 0.96 <sup>a</sup> $\pm$ 0.15<br>(N=6)    | 1.11 <sup>a</sup> $\pm$ 0.10<br>(N=7)  | 0.82 <sup>a*</sup> $\pm$ 0.08<br>(N=7)  |
|                                | cathepsin L_92i4 | 0.57 <sup>AB</sup> $\pm$ 0.19<br>(N=7) | 0.67 <sup>A</sup> $\pm$ 0.14<br>(N=7)  | 0.30 <sup>B</sup> $\pm$ 0.05<br>(N=7)  | 0.31 <sup>a</sup> $\pm$ 0.04<br>(N=6)    | 0.37 <sup>a</sup> $\pm$ 0.05<br>(N=7)  | 0.33 <sup>a</sup> $\pm$ 0.03<br>(N=7)   |
|                                | sex pooled       | 0.46 <sup>a</sup> $\pm$ 0.11 (N=13)    |                                        | 0.52 <sup>a</sup> $\pm$ 0.08 (N=14)    |                                          | 0.32 <sup>a</sup> $\pm$ 0.03 (N=14)    |                                         |
|                                | cathepsin L_92i6 | 0.61 <sup>A</sup> $\pm$ 0.13<br>(N=7)  | 0.64 <sup>A</sup> $\pm$ 0.10<br>(N=7)  | 0.45 <sup>A*</sup> $\pm$ 0.06<br>(N=7) | 0.56 <sup>a</sup> $\pm$ 0.05<br>(N=6)    | 0.57 <sup>a</sup> $\pm$ 0.23<br>(N=7)  | 0.70 <sup>a*</sup> $\pm$ 0.06<br>(N=7)  |
|                                | cathepsin L_473  | 0.75 <sup>A*</sup> $\pm$ 0.18<br>(N=7) | 1.97 <sup>B*</sup> $\pm$ 0.30<br>(N=7) | 1.01 <sup>A*</sup> $\pm$ 0.14<br>(N=7) | 0.19 <sup>*</sup> $\pm$ 4.0E-03<br>(N=6) | 0.22 <sup>a*</sup> $\pm$ 0.04<br>(N=7) | 0.17 <sup>a*</sup> $\pm$ 0.03<br>(N=7)  |

**TABLE S6** Phenoloxidase activity. Mean enzymatic activity (U) ± standard error (SEM) of phenoloxidase (PO) and prophenoloxidase (ProPO) measured in *Euscelidius variegatus* haemolymph samples (plasma and haemocyte lysate supernatant, HLS, fractions) in healthy (H), chrysanthemum yellows (CYp) infected, or Flavescence dorée (FDp) infected insects. Duration (final time in minutes) and slope of exponential linear phase of the reaction are also indicated. Within the same category (H, CY, FD), asterisks indicate significant differences between female and male of each category. Within the same gender, different letters indicate significant differences among the categories (capitalized for females and small for males). Whenever no sex-related differences were recorded within the same category, female and male data were pooled. As similar PO activities were recorded in HLS fraction either in the presence and in the absence of the specific inhibitor phenylthiourea, comparison between gender and among categories was not performed and no slope was calculated.

| Haemolymph fraction | Enzyme | Measured parameter    | Female                          |                                 |                                 | Male                              |                                  |                                  |                                 |  |  |
|---------------------|--------|-----------------------|---------------------------------|---------------------------------|---------------------------------|-----------------------------------|----------------------------------|----------------------------------|---------------------------------|--|--|
|                     |        |                       | H                               | CY                              | FD                              | H                                 | CY                               | FD                               |                                 |  |  |
| Plasma              | PO     | Activity (U ± SEM, N) | 0.17 <sup>A</sup> ± 0.03 (N=5)  | 0.14 <sup>A</sup> ± 0.02 (N=7)  | 0.13 <sup>A</sup> ± 0.02 (N=8)  | 0.12 <sup>a</sup> ± 0.02 (N= 5)   | 0.12 <sup>a</sup> ± 0.02 (N= 6)  | 0.13 <sup>a</sup> ± 0.02 (N= 5)  |                                 |  |  |
|                     |        | Final time            |                                 | 570 min                         |                                 |                                   | 570 min                          |                                  |                                 |  |  |
|                     |        | Slope                 | 2.0E-04                         | 2.0E-04                         | 2.0E-04                         | 1.0E-04                           | 1.0E-04                          | 1.0E-04                          |                                 |  |  |
|                     | ProPO  | Activity (U ± SEM, N) | 2.83 <sup>A*</sup> ± 0.50 (N=5) | 2.86 <sup>A*</sup> ± 0.51 (N=7) | 4.18 <sup>A*</sup> ± 0.64 (N=7) | 0.63 <sup>ab*</sup> ± 0.09 (N= 4) | 0.55 <sup>a*</sup> ± 0.17 (N= 6) | 1.12 <sup>b*</sup> ± 0.14 (N= 5) |                                 |  |  |
|                     |        | Final time            |                                 | 150 min                         |                                 |                                   | 330 min                          |                                  |                                 |  |  |
|                     |        | Slope                 | 2.8E-03                         | 2.8E-03                         | 4.1E-03                         | 6.0E-04                           | 6.0E-04                          | 1.2E-03                          |                                 |  |  |
| HLS                 | PO     | Activity (U ± SEM, N) | 0.02 ± 0.01 (N=5)               | -1E-03 ± 0.01 (N=7)             | 0.01 ± 0.01 (N=8)               | 0.02 ± 0.01 (N=5)                 | 0.02 ± 0.01 (N=6)                | 0.03 ± 0.02 (N=5)                |                                 |  |  |
|                     |        | Final time            |                                 | 570 min                         |                                 |                                   | 570                              |                                  |                                 |  |  |
|                     |        | Slope                 | 2.0E-04                         | 2.0E-04                         | 4.0E-04                         | 1.0E-04                           | 9.0E-05                          | 2.0E-04                          |                                 |  |  |
|                     | ProPO  | Activity (U ± SEM, N) | 0.21 <sup>A</sup> ± 0.05 (N=4)  | 0.15 <sup>A</sup> ± 0.02 (N=6)  | 0.35 <sup>A</sup> ± 0.09 (N=6)  | 0.13 <sup>a</sup> ± 0.03 (N= 5)   | 0.10 <sup>a</sup> ± 0.02 (N= 6)  | 0.17 <sup>a</sup> ± 0.01 (N= 5)  |                                 |  |  |
|                     |        | Final time            |                                 | 390 min                         |                                 |                                   | 270 min                          |                                  |                                 |  |  |
|                     |        | Slope                 | 2.0E-04                         | 2.0E-04                         | 4.0E-04                         | 1.0E-04                           | 9.0E-05                          | 2.0E-04                          |                                 |  |  |
| Sex pooled          |        |                       | <b>H</b>                        | <b>CY</b>                       | <b>FD</b>                       |                                   |                                  |                                  |                                 |  |  |
| Activity            |        |                       | 0.17 <sup>ab</sup> ± 0.03 (N=9) |                                 |                                 | 0.13 <sup>a</sup> ± 0.01 (N=12)   |                                  |                                  | 0.27 <sup>b</sup> ± 0.05 (N=11) |  |  |

**TABLE S7** Pigmentation and immunocompetence assays. Pigmentation assay: mean degree of grey intensity  $\pm$  standard error (SEM) calculated for body (dorsal side) and forewing of insects healthy (H), infected by chrysanthemum yellows (CYp) or by Flavescence dorée (FDp) phytoplasmas. The pigmentation is expressed as a numerical reading ranging from 0 for black to 255 for white. Within the same category (H, CY, FD), asterisks indicate significant differences between female and male of each category. Within the same gender, different letters indicate significant differences among the categories (capitalized for females and small for males).

For the immunocompetence assay, nylon threads were implanted in *Euscelidius variegatus* healthy (H) and infected by chrysanthemum yellows (CYp) or Flavescence dorée (FDp) phytoplasmas. Mean melanization index (MI) of the nylon thread implants and mean number of adherent cells were determined ( $\pm$  standard error of the means). MI was the ratio between the Integrated Density/surface unit of nylon portions inside and outside the body of each H, CY and FD infected insect. Mean number of cells adherent to the surface of each nylon thread was calculated following DAPI staining and confocal microscopy observations. Whenever no sex-related differences were recorded within the same category, female and male data were pooled. Within each line, different letters indicate significant differences among the categories (H, CY, FD).

| Assay            | Measured parameter       | Female                                 |                                        |                                        | Male                                   |                                        |                                        |
|------------------|--------------------------|----------------------------------------|----------------------------------------|----------------------------------------|----------------------------------------|----------------------------------------|----------------------------------------|
|                  |                          | H                                      | CY                                     | FD                                     | H                                      | CY                                     | FD                                     |
| Pigmentation     | Body (dorsal side)       | 94.24 <sup>A*</sup> $\pm$ 1.09 (N=36)  | 92.56 <sup>A*</sup> $\pm$ 1.53 (N=30)  | 84.66 <sup>B*</sup> $\pm$ 1.06 (N=36)  | 88.18 <sup>a*</sup> $\pm$ 1.95 (N=23)  | 83.83 <sup>a*</sup> $\pm$ 1.63 (N=23)  | 75.06 <sup>b*</sup> $\pm$ 1.62 (N=20)  |
|                  | Forewing                 | 200.79 <sup>A*</sup> $\pm$ 2.28 (N=36) | 202.66 <sup>A*</sup> $\pm$ 3.46 (N=30) | 197.20 <sup>A*</sup> $\pm$ 1.95 (N=36) | 181.53 <sup>a*</sup> $\pm$ 3.34 (N=22) | 182.04 <sup>a*</sup> $\pm$ 2.97 (N=30) | 183.00 <sup>a*</sup> $\pm$ 3.30 (N=20) |
| Immunocompetence | Sex pooled               | <b>H</b>                               |                                        |                                        | <b>CY</b>                              |                                        | <b>FD</b>                              |
|                  | Melanization Index       | 0.90 <sup>a</sup> $\pm$ 0.03 (N=11)    |                                        |                                        | 0.72 <sup>b</sup> $\pm$ 0.04 (N=12)    |                                        | 0.79 <sup>ab</sup> $\pm$ 0.03 (N=23)   |
|                  | Number of adherent cells | 57.10 <sup>a</sup> $\pm$ 10.33 (N=10)  |                                        |                                        | 184.42 <sup>b</sup> $\pm$ 29.41 (N=12) |                                        | 36.00 <sup>a</sup> $\pm$ 8.15 (N=18)   |



**TABLE S8 MOVEMENT AND RESPIRATION ASSAYS.** Movement assay: mean time (seconds) required to leave the 1<sup>st</sup> and the 2<sup>nd</sup> circles and mean number of jumps  $\pm$  standard error (SEM), measured observing for 300 sec single insect of the category healthy (H), infected by chrysanthemum yellows (CYp) or by Flavescence dorée (FDp) phytoplasmas. Within the same gender, different letters indicate significant differences among the categories (capitalized for females and small for males).

Respiration assay: mean CO<sub>2</sub> production ( $\mu$ l/h per single insect)  $\pm$  standard error (SEM), as recorded by gas exchange chamber for insect of the category healthy (H), infected by chrysanthemum yellows (CYp) or by Flavescence dorée (FDp) phytoplasmas. Whenever no sex-related differences were recorded within the same category, female and male data were pooled. Different letters indicate significant differences among the categories.

| Assay       | Measured parameter                     | Female                                |                                       |                                       | Male                                   |                                       |                                        |
|-------------|----------------------------------------|---------------------------------------|---------------------------------------|---------------------------------------|----------------------------------------|---------------------------------------|----------------------------------------|
|             |                                        | H                                     | CY                                    | FD                                    | H                                      | CY                                    | FD                                     |
| Movement    | Total observed insects                 | 22                                    | 24                                    | 24                                    | 22                                     | 23                                    | 23                                     |
|             | Time within 1 <sup>st</sup> circle (s) | 47.60 <sup>A</sup> $\pm$ 11.20 (N=15) | 65.25 <sup>A</sup> $\pm$ 17.41 (N=20) | 41.89 <sup>A</sup> $\pm$ 5.38 (N= 18) | 64.65 <sup>a</sup> $\pm$ 11.13 (N= 17) | 36.86 <sup>a</sup> $\pm$ 5.83 (N= 21) | 50.55 <sup>a</sup> $\pm$ 7.41 (N= 20)  |
|             | Time within 2 <sup>nd</sup> circle (s) | 44.71 <sup>A</sup> $\pm$ 10.65 (N=14) | 70.56 <sup>A</sup> $\pm$ 16.75 (N=18) | 53.82 <sup>A</sup> $\pm$ 7.35 (N=17)  | 65.93 <sup>a</sup> $\pm$ 12.61 (N= 15) | 40.78 <sup>a</sup> $\pm$ 6.33 (N= 18) | 69.85 <sup>a</sup> $\pm$ 12.68 (N= 20) |
|             | Number of jumps                        | 1.41 <sup>A</sup> $\pm$ 0.28 (N=22)   | 1.83 <sup>A</sup> $\pm$ 0.33 (N=24)   | 1.79 <sup>A</sup> $\pm$ 0.36 (N=24)   | 1.55 <sup>a</sup> $\pm$ 0.39 (N= 22)   | 2.35 <sup>a</sup> $\pm$ 0.46 (N= 23)  | 1.65 <sup>a</sup> $\pm$ 0.25 (N=23)    |
| Respiration | Sex pooled                             | H                                     |                                       | CY                                    |                                        | FD                                    |                                        |
|             | CO <sub>2</sub> production             | 0.90 <sup>a</sup> $\pm$ 0.05 (N=8)    |                                       | 1.52 <sup>b</sup> $\pm$ 0.14 (N=8)    |                                        | 1.09 <sup>a</sup> $\pm$ 0.12 (N=8)    |                                        |

**TABLE S9** Genes analyzed in qRT-PCR and corresponding specific primers. Efficiency (E%) of qPCR reaction, Correlation coefficient (R<sup>2</sup>) of standard curve and Melting peak temperature (Melt Peak T) were calculated by CFX Software Manager ver. 3.1 (Bio-Rad).

| Metabolism                     | Gene                                   | Eva transcript ID | Primer name              | Primer sequence 5'-3'     | Amplicon length (bp) | qPCR Parameters |                |                  |
|--------------------------------|----------------------------------------|-------------------|--------------------------|---------------------------|----------------------|-----------------|----------------|------------------|
|                                |                                        |                   |                          |                           |                      | E%              | R <sup>2</sup> | Melt Peak T (°C) |
| Immune response                | phenoloxidase                          | TR176219_c0_g1_i1 | PO2_F1020                | CAATGTGGTTCCTCAGGAT       | 115                  | 103.0           | 0.997          | 74.5             |
|                                |                                        |                   | PO2_R1085                | TCTGCGAGGTCTCATTCTGT      |                      |                 |                |                  |
|                                | Kazal type 1 serine protease inhibitor | TR23882_c3_g1_i1  | kaz1_F70                 | CTGGTTCGCAGGCAAATACC      | 103                  | 110.3           | 0.997          | 80.0             |
| Movement and energy metabolism | myosin                                 | TR57237_c0_g1_i1  | MYO-L1_F138              | CCAGTGTGAAGGGAGCGATT      | 126                  | 95.0            | 0.993          | 80.5             |
|                                |                                        |                   | MYO-L1_R263              | CATGTAGACGTGGTGGAGCT      |                      |                 |                |                  |
|                                | tropomyosin                            | TR11297_c7_g1_i2  | Tm1Fw783                 | GGTGGAGAAGGAACGTTATCG     | 78                   | 92.0            | 0.997          | 77.0             |
|                                |                                        |                   | Tm1Rv860                 | GCAGATTAGTATCCGTATAACTCTA |                      |                 |                |                  |
|                                | arginine kinase                        | TR201186_c0_g1_i1 | ArgKin_F793              | CTGGGCTTCCTCACCTTCTG      | 121                  | 99.6            | 1.000          | 83.5             |
|                                |                                        |                   | ArgKin_R913              | TGAACTTTCCAGCGACCTCC      |                      |                 |                |                  |
| maltase                        | TR70195_c0_g1_i2                       | MALT1_F1345       | CAATAAGCGCTGGTTTCTCC     | 90                        | 94.0                 | 0.993           | 79.0           |                  |
|                                |                                        | MALT1_R1434       | CATTTCTTTGGGCCTCCAC      |                           |                      |                 |                |                  |
| Proteases                      | cathepsin L_92i3                       | TR22292_c3_g1_i3  | CATH-L_F1065             | GCATCACACGAGTCCTTCCA      | 156                  | 93.0            | 0.996          | 82.5             |
|                                |                                        |                   | CATH-L_R1220             | CGTTGTGGCCCATGAGTTCT      |                      |                 |                |                  |
|                                | cathepsin L_92i4                       | TR22292_c3_g1_i4  | CathL92_i4-6F            | CATTAAGATGGCCCAGAAACAAAG  | 170                  | 88.7            | 0.992          | 83.0             |
|                                |                                        |                   | CathL92_i4R              | AAGACAATTTAGCACTGTCGGT    |                      |                 |                |                  |
| cathepsin L_92i6               | TR22292_c3_g1_i6                       | CathL92_i4-6F     | CATTAAGATGGCCCAGAAACAAAG | 166                       | 85.7                 | 0.990           | 83.5           |                  |
|                                |                                        | CathL92_i6R       | AAGTTTGGCACTGTCGGTAAGG   |                           |                      |                 |                |                  |
| cathepsin L_473                | TR18473_c0_g1_i1                       | CathL473_F        | CGTCAAGAAGCAGGGCCAAT     | 92                        | 92.8                 | 0.999           | 82.0           |                  |
|                                |                                        | CathL473_R        | CCAGCTTGCCAGACTTGAGG     |                           |                      |                 |                |                  |

**TABLE S10** List of candidate reference genes and corresponding specific primers evaluated for stability in RT-qPCR. Efficiency (E%) of qPCR reaction, Correlation coefficient (R<sup>2</sup>) of standard curve, Melting peak temperature (Melt Peak T), Coefficient of Variation (CV) and expression stability value (M) were calculated by CFX Software Manager ver. 3.1 (Bio-Rad). In bold: selected reference genes for this study.

| Gene                                          | Eva transcript ID | Primer name         | Primer sequence 5'-3'   | Amplicon length (bp) | qPCR Parameters |                |                  | Reference gene stability values |       |
|-----------------------------------------------|-------------------|---------------------|-------------------------|----------------------|-----------------|----------------|------------------|---------------------------------|-------|
|                                               |                   |                     |                         |                      | E%              | R <sup>2</sup> | Melt Peak T (°C) | CV                              | M     |
| <b>elongation factor-1<math>\alpha</math></b> | TR29211_c0_g2_i1  | EF1- $\alpha$ _F215 | CCATCGACATTGCCCTGTGG    | 111                  | 87.9            | 0.997          | 78.5             | 0.144                           | 0.51  |
|                                               |                   | EF1- $\alpha$ _R325 | CCTGTGAGGTTCCAGTGATCATG |                      |                 |                |                  |                                 |       |
| <b>glutathione S-transferase</b>              | TR32009_c0_g1_i1  | GST1_F257           | CCAAGGACCCCAAGAAGCGA    | 113                  | 87.3            | 0.997          | 79.0             | 0.260                           | 0.60  |
|                                               |                   | GST1_R369           | TGGCGCTCCTCCAAAACATCA   |                      |                 |                |                  |                                 |       |
| <b>heat shock protein 70-1</b>                | TR176296_c0_g1_i1 | HSP70_F808          | CGCACCTTGTCATCCAGCAC    | 115                  | 88.1            | 0.998          | 83.0             | 0.299                           | 0.65  |
|                                               |                   | HSP70_R922          | ACAGGTCGGAGCACAGTTCC    |                      |                 |                |                  |                                 |       |
| ATP synthase-beta                             | TR146391_c0_g1_i1 | ATP $\beta$ Fw622   | CGCTTTACTCAGGCTGGTTC    | 171                  | 100.0           | 0.995          | 83.5             | 0.329                           | 0.697 |
|                                               |                   | ATP $\beta$ Rv792   | GTCATCAGCTGGCACGTAGA    |                      |                 |                |                  |                                 |       |
| succinate dehydrogenase                       | TR217947_c0_g1_i1 | SDHubi_F338         | AGGAGGACAACCTGGCAGTGG   | 58                   | 98.1            | 0.998          | 77.0             | 0.330                           | 0.672 |
|                                               |                   | SDHubi_R395         | CCCAGCCAATCAGAACCCTTT   |                      |                 |                |                  |                                 |       |
| glyceraldehyde 3-phosphate dehydrogenase      | JX273239          | GAPFw632            | ATCCGTCGTCGACCTTACTG    | 51                   | 99.0            | 0.998          | 77.5             | 0.452                           | 0.776 |
|                                               |                   | GAPRv682            | TCATCGTAGCTGGCTTCCTTG   |                      |                 |                |                  |                                 |       |

**TABLE S11** Statistical analysis used for different assays: t-test or non parametric Mann-Whitney test were used to compare female and male insects of different experimental categories (healthy- H, chrysanthemum yellows-CYp- or flavescence dorée-FDp- infected insects); One way analysis of variance (ANOVA) or non parametric Kruskal-Wallis test were used to compare H, CY and FD category, generally by separating insects for different sex, and in some cases by pooling insects together regardless the gender, when no significant differences were found between sex. Significant differences are in bold.

| Assay                  | Parameter                      | Female vs. Male   | H vs. CY vs. FD                            |                                |
|------------------------|--------------------------------|-------------------|--------------------------------------------|--------------------------------|
|                        |                                |                   | Female                                     | Male                           |
| qPCR validation        | phenoloxidase                  | Mann-Whitney      | Kruskal-Wallis, P=0.989                    | Kruskal-Wallis, P=0.731        |
|                        | Kazal type 1                   | Mann-Whitney      | ANOVA, P=0.689                             | <b>ANOVA, P=0.019</b>          |
|                        | myosin                         | Two-tailed t-test | ANOVA, P=0.569                             | ANOVA, P=0.198                 |
|                        | tropomyosin                    | Mann-Whitney      | ANOVA, P=0.216                             | <b>Kruskal-Wallis, P=0.015</b> |
|                        | arginine kinase                | Two-tailed t-test | <b>ANOVA, P=0.025</b>                      | <b>ANOVA, P&lt;0.001</b>       |
|                        | maltase                        | Two-tailed t-test | Kruskal-Wallis, P=0.128                    | ANOVA, P=0.197                 |
|                        | cathepsin L_473                | Mann-Whitney      | <b>ANOVA, P=0.002</b>                      | Kruskal-Wallis, P= 0.437       |
|                        | cathepsin L_92i3               | Two-tailed t-test | <b>Kruskal-Wallis, P=0.014</b>             | ANOVA, P=0.203                 |
|                        | cathepsin L_92i4               | Two-tailed t-test | <b>Kruskal-Wallis, P=0.028</b>             | ANOVA, P=0.618                 |
|                        | cathepsin L_92i6               | Mann-Whitney      | ANOVA, P=0.382                             | Kruskal-Wallis, P= 0.446       |
| Phenoloxidase activity | Plasma PO                      | Two-tailed t-test | ANOVA, P=0.551                             | ANOVA, P=0.857                 |
|                        | Plasma ProPO                   | Two-tailed t-test | Kruskal-Wallis, P=0.192                    | <b>ANOVA, P=0.045</b>          |
|                        | HLS ProPO                      | Two-tailed t-test | <b>Kruskal-Wallis (pooled), P=0.021</b>    |                                |
| Pigmentation           | Body                           | Two-tailed t-test | <b>ANOVA, P&lt;0.001</b>                   | <b>ANOVA, P&lt;0.001</b>       |
|                        | Forewing                       | Two-tailed t-test | Kruskal-Wallis, P=0.163                    | ANOVA, P=0.954                 |
| Immuno-competence      | Melanization Index             | Two-tailed t-test | <b>ANOVA (pooled), P=0.007</b>             |                                |
|                        | Number of nuclei               | Two-tailed t-test | <b>Kruskal-Wallis (pooled), P&lt;0.001</b> |                                |
| Movement               | Time in 1 <sup>st</sup> circle | Mann-Whitney      | Kruskal-Wallis, P=0.857                    | Kruskal-Wallis, P=0.063        |
|                        | Time in 2 <sup>nd</sup> circle | Mann-Whitney      | Kruskal-Wallis, P=0.406                    | Kruskal-Wallis, P=0.176        |
|                        | Number of jumps                | Mann-Whitney      | Kruskal-Wallis, P=0.704                    | Kruskal-Wallis, P=0.365        |
| Respiration            | CO <sub>2</sub> production     | Two-tailed t-test | <b>ANOVA (pooled), P=0.002</b>             |                                |

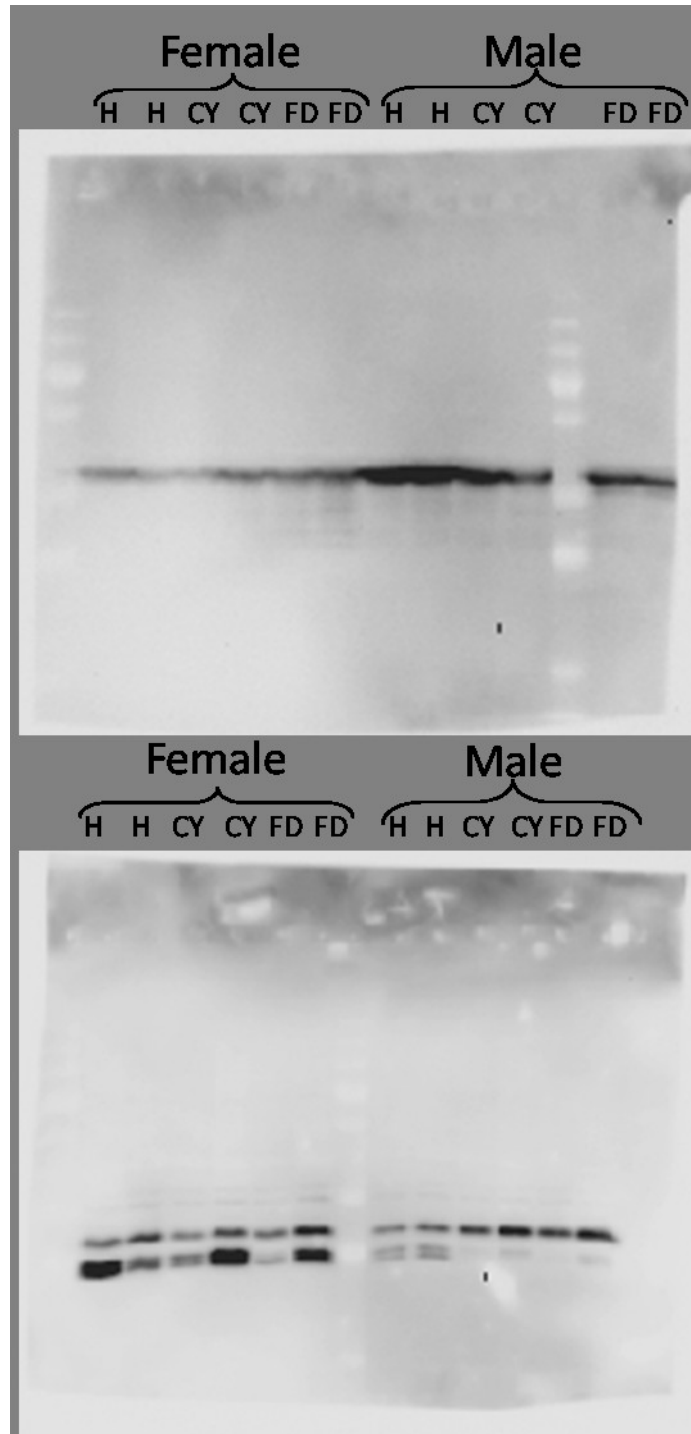

**FIG S1** Full length original blots presented in Figure 3I and Figure 4G. Two biological replicates of each sample were loaded in adjacent lanes and only one was presented in final figures 3I (upper panel) and 4G (lower panel). Prestained Protein SHARPMASST<sup>TM</sup> VPlus (Euroclone) was used as protein MW marker.
